# Supplementary material for: Development of an International System of Units (SI)-traceable transmission curve reference material to improve the quantitation and comparability of proton-transfer-reaction mass-spectrometry measurements
Source: Copernicus journal article supplement (doi:10.5194/amt-16-1061-2023), 2023-03-02
Supplement: Supplementary file 1 [file amt-16-1061-2023-supplement.pdf]

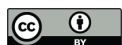

*Supplement of*

**Development of an International System of Units (SI)-traceable transmission curve reference material to improve the quantitation and comparability of proton-transfer-reaction mass-spectrometry measurements**

**David R. Worton et al.**

*Correspondence to:* David R. Worton ([dave.worton@npl.co.uk](mailto:dave.worton@npl.co.uk))

The copyright of individual parts of the supplement might differ from the article licence.

## Contents

|                                                                                                           |    |
|-----------------------------------------------------------------------------------------------------------|----|
| Supplementary text: Preparation of D3-siloxane reference materials                                        | 2  |
| Table S1 Measured and predicted reaction rate constants for all 20 compounds present in the PRMs and CRMs | 3  |
| Table S2 Physical properties, purity and sources of the pure chemicals                                    | 4  |
| Table S3 Dates for all the comparisons conducted as part of the validation process                        | 5  |
| Figure S1 Stability plots of all components present in the PTR-MS transmission curve reference material   | 6  |
| Figure S2 Additional supporting validation information using all available FID and MS data                | 9  |
| Supplementary text: Preparation and validation of certified reference materials                           | 10 |
| Figure S3 Certified amount fractions of 12 CRMs illustrating the preparation repeatability                | 11 |
| Figure S4. Fragmentation of cyclic siloxanes in PTR-MS                                                    | 12 |
| Supplementary text: Additional References                                                                 | 13 |

### **Preparation of D3-siloxane reference materials**

Hexamethylcyclotrisiloxane (D3-siloxane) is a solid at room temperature and pressure because of its unique phase transition properties. To enable it to be added to the gas cylinder it was dissolved in a solvent (*n*-hexane). *N*-hexane was selected because previous work (Kierkegaard and McLachlan, 2013) has demonstrated it to be effective for dissolving D3-siloxane.

A ratio of nominally 0.05 mol mol<sup>-1</sup> of D3-siloxane to *n*-hexane was empirically determined to avoid any precipitation of D3-siloxane from solution and to ensure the homogeneity of the mixture prior to injection into the cylinder. This was determined by preparing different solutions of D3-siloxane in *n*-hexane in 10 mL vials, splitting the content into multiple 2 mL prior to analysis on a GC-MS/FID (Agilent 6890/5973) equipped with a liquid autosampler. The GC-MS/FID was fitted with a capillary column (HP-5MS 30 m x 250 µm x 1 µm), the carrier gas was helium with a constant head pressure of 15 psi and a temperature program started at 30 °C hold for 5 minutes and then ramped up at 10 °C min<sup>-1</sup> to 140 °C; the total time was 16 minutes.

**Table S1.** Measured and predicted reaction rate constants for all 20 compounds present in the PRMs and CRMs taken from Zhao and Zhang (2004) and references therein, from Holzinger et al., (2019) and those recommended in this work for those components not reported in Holzinger et al., (2019).

| Compound     | Measured   | Proton reaction rate coefficients ( $10^{-9} \text{ cm}^3 \text{ s}^{-1}$ ) |                          |           |
|--------------|------------|-----------------------------------------------------------------------------|--------------------------|-----------|
|              |            | Predicted                                                                   | Holzinger et al., (2019) | This work |
| methanol     | 2.1 – 3.8  | 2.33                                                                        | 2.20                     | -         |
| acetonitrile | 4.5        | 4.74                                                                        | 3.10                     | -         |
| acetaldehyde | 3.55 – 3.7 | 3.36                                                                        | 3.03                     | -         |
| propane      | -          | -                                                                           | -                        | -         |
| ethanol      | 2.7 – 3.8  | 2.26                                                                        | -                        | -         |
| acetone      | 3.9 – 4.1  | 3.0                                                                         | 3.25                     | -         |
| DMS          | 1.7 – 2.5  | 2.53                                                                        | -                        | 2.30      |
| isoprene     | 2.0, 1.3   | 1.94                                                                        | 1.85                     | -         |
| MVK          | -          | -                                                                           | 2.72                     | -         |
| MEK          | -          | -                                                                           | 3.25                     | -         |
| benzene      | 1.3 – 2.1  | 1.97                                                                        | 1.97                     | -         |
| toluene      | 1.3 – 2.3  | 2.12                                                                        | -                        | 2.15      |
| m-xylene     | 2.3        | 2.26                                                                        | 2.31                     | -         |
| 1,2,4-TMB    | 2.4        | 2.4                                                                         | 2.40                     | -         |
| 1,2,4-TFB    | -          | -                                                                           | 2.46                     | -         |
| 3-carene     | 2.2        | 2.44                                                                        | 2.04                     | -         |
| 1,2,4-TCB    | -          | -                                                                           | 2.40                     | -         |
| D3-siloxane  | -          | -                                                                           | 2.16                     | -         |
| D4-siloxane  | -          | -                                                                           | 2.99                     | -         |
| D5-siloxane  | -          | -                                                                           | 3.39                     | -         |
| PFTBA        | -          | -                                                                           | -                        | 3.50      |

**Table S2.** Physical properties (boiling point and vapour pressure), purity (%) and sources (chemical manufacturer) of the pure chemicals.

| Compound     | boiling point (K)    |                    | vapour pressure (Pa)      |                        | Purity (%) | Source          |
|--------------|----------------------|--------------------|---------------------------|------------------------|------------|-----------------|
|              | NIST <sup>a</sup>    | USEPA <sup>b</sup> | Experimental <sup>b</sup> | Estimated <sup>c</sup> |            |                 |
| methanol     | 337.8 ± 0.3          | 337.9              | 1.69×10 <sup>4</sup>      | 1.58×10 <sup>4</sup>   | >99.9      | Alfa Aesar      |
| acetonitrile | 354.8 ± 0.4          | 354.8              | 1.18×10 <sup>4</sup>      | 2.67×10 <sup>4</sup>   | >99.9      | Sigma Aldrich   |
| acetaldehyde | 294.0 ± 0.8          | 293.3              | 1.20×10 <sup>5</sup>      | 1.21×10 <sup>5</sup>   | >99.9      | Fluka           |
| propane      | 231.1 ± 0.2          | 231.1              | 9.53×10 <sup>5</sup>      | 8.19×10 <sup>5</sup>   | >99.9      | Air Liquide     |
| ethanol      | 351.5 ± 0.2          | 351.4              | 7.91×10 <sup>3</sup>      | 8.12×10 <sup>3</sup>   | >99.9      | Fisher Chemical |
| acetone      | 329.5 ± 0.9          | 329.2              | 3.09×10 <sup>4</sup>      | 3.32×10 <sup>4</sup>   | >99.9      | Alfa Aesar      |
| DMS          | 311 ± 3              | 310.5              | 6.69×10 <sup>4</sup>      | 6.38×10 <sup>4</sup>   | 99.9       | Alfa Aesar      |
| isoprene     | 307 ± 2              | 307.2              | 7.33×10 <sup>4</sup>      | 7.35×10 <sup>4</sup>   | >99.9      | Aldrich         |
| MVK          | 354 ± 4              | 354.6              | nd <sup>d</sup>           | 1.22×10 <sup>4</sup>   | 98.0       | Alfa Aesar      |
| MEK          | 353 ± 1              | 352.7              | 1.21×10 <sup>4</sup>      | 1.31×10 <sup>4</sup>   | >99.9      | Sigma Aldrich   |
| benzene      | 353.3 ± 0.1          | 353.2              | 1.26×10 <sup>4</sup>      | 1.16×10 <sup>4</sup>   | >99.9      | Sigma Aldrich   |
| toluene      | 383.8 ± 0.2          | 383.8              | 3.79×10 <sup>3</sup>      | 3.16×10 <sup>3</sup>   | >99.9      | Sigma Aldrich   |
| m-xylene     | 412.3 ± 0.3          | 412.3              | 1.11×10 <sup>3</sup>      | 0.88×10 <sup>3</sup>   | 99.9       | Sigma Aldrich   |
| 1,2,4-TMB    | 442.4 ± 0.8          | 442.5              | 2.80×10 <sup>2</sup>      | 2.15×10 <sup>2</sup>   | 99.6       | Alfa Aesar      |
| 1,2,4-TFB    | 362 - 364            | 363.2              | nd                        | 7.65×10 <sup>3</sup>   | 99.9       | Fluka           |
| 3-carene     | 444 ± 5 <sup>f</sup> | 443.2              | nd                        | 2.79×10 <sup>2</sup>   | 98.0       | Alfa Aesar      |
| 1,2,4-TCB    | 486.7                | 486.7              | 6.13×10 <sup>1</sup>      | 2.44×10 <sup>1</sup>   | 99.5       | Fluka           |
| D3-siloxane  | 407                  | 407.2              | 4.71×10 <sup>2</sup>      | 1.16×10 <sup>3</sup>   | 99.9       | Sigma Aldrich   |
| D4-siloxane  | 446 - 449            | 449.0              | 1.40×10 <sup>2</sup>      | 1.58×10 <sup>2</sup>   | 99.7       | Aldrich         |
| D5-siloxane  | 483 <sup>g</sup>     | 483.2              | 2.67×10 <sup>1</sup>      | 29.1                   | 99.5       | Aldrich         |
| PFTBA        | 452 ± 1              | nd                 | nd                        | nd                     | 87.6       | Alfa Aesar      |

<sup>a</sup> Retrieved from <https://webbook.nist.gov> on January 11<sup>th</sup> 2023. <sup>b</sup> Experimental vapour pressure data at 298 K retrieved from the United States Environmental Protection Agency EPI Suite v4.11, downloaded from <https://www.epa.gov/tscs-screening-tools/download-epi-suite-tm-estimation-program-interface-v411> on January 11<sup>th</sup> 2023.

<sup>c</sup> Calculated vapour pressure at 298 K determined as an average of the Antoine and Grain methods determined using the United States Environmental Protection Agency EPI Suite v4.11, downloaded from <https://www.epa.gov/tscs-screening-tools/download-epi-suite-tm-estimation-program-interface-v411> on January 11<sup>th</sup> 2023. <sup>d</sup> Only non-critical impurities are included here as critical impurities, namely any of the 20 components listed in this table, are already included in the final amount fraction of any resultant mixture. <sup>e</sup> no experimental data available. <sup>f</sup> Calculated as the average of 3 results and the uncertainty was determined by combining the reported uncertainties in quadrature. <sup>g</sup> National Center for Biotechnology Information (2023). PubChem Compound Summary for CID 10913, Decamethylcyclopentasiloxane. Retrieved January 11, 2023 from <https://pubchem.ncbi.nlm.nih.gov/compound/Decamethylcyclopentasiloxane>.

**Table S3.** Dates for all the comparisons conducted as part of the validation process.

| Date of comparison | Instrument  | Reference PRM  | Unknown PRM | Age difference  (days) |
|--------------------|-------------|----------------|-------------|------------------------|
| 29 August 2019     | GC-FID/MS   | 0819           | 1218        | 262                    |
| 4 September 2020   | GC-FID/MS   | 0819           | 1218        | 262                    |
| 10 September 2020  | GC-FID/MS   | 0819           | 0917a       | 704                    |
| 11 September 2020  | GC-FID/MS   | 0819           | 0917b       | 704                    |
| 27 October 2020    | GC-FID/MS   | 0819           | 0119        | 233                    |
| 2 December 2020    | Cryo-GC-FID | 0819           | 1218        | 262                    |
| 10 December 2020   | Cryo-GC-FID | 0819           | 0917b       | 704                    |
| 11 December 2020   | Cryo-GC-FID | 0819           | 0119        | 233                    |
| 14 December 2020   | Cryo-GC-FID | 0819           | 0917a       | 704                    |
| 1 September 2021   | GC-FID/MS   | 0819           | 0821        | 709                    |
| 8 June 2022        | GC-FID/MS   | 0821 (toluene) | D711534     | 255                    |
| 16 September 2021  | GC-FID/MS   | 0821 (PFTBA)   | D961399     | 46                     |
| 17 September 2021  | GC-FID/MS   | 0821 (PFTBA)   | D961410     | 47                     |

**Figure S1.** Stability plots of all components present in the PTR-MS transmission curve reference material. The open symbols show the original data before being corrected for biases in the parent mixtures (for methanol, MVK and 1,2,4-TMB) or which has been excluded from the regression analysis (for D4-siloxane and D5-siloxane) as discussed in the text. The best fit curves from least squares straight line regression analyses are shown (solid black line) along with the 95 % confidence interval of the fits (shaded area). The slope, intercept and F-statistic data from the regression analyses are shown in Table 3.

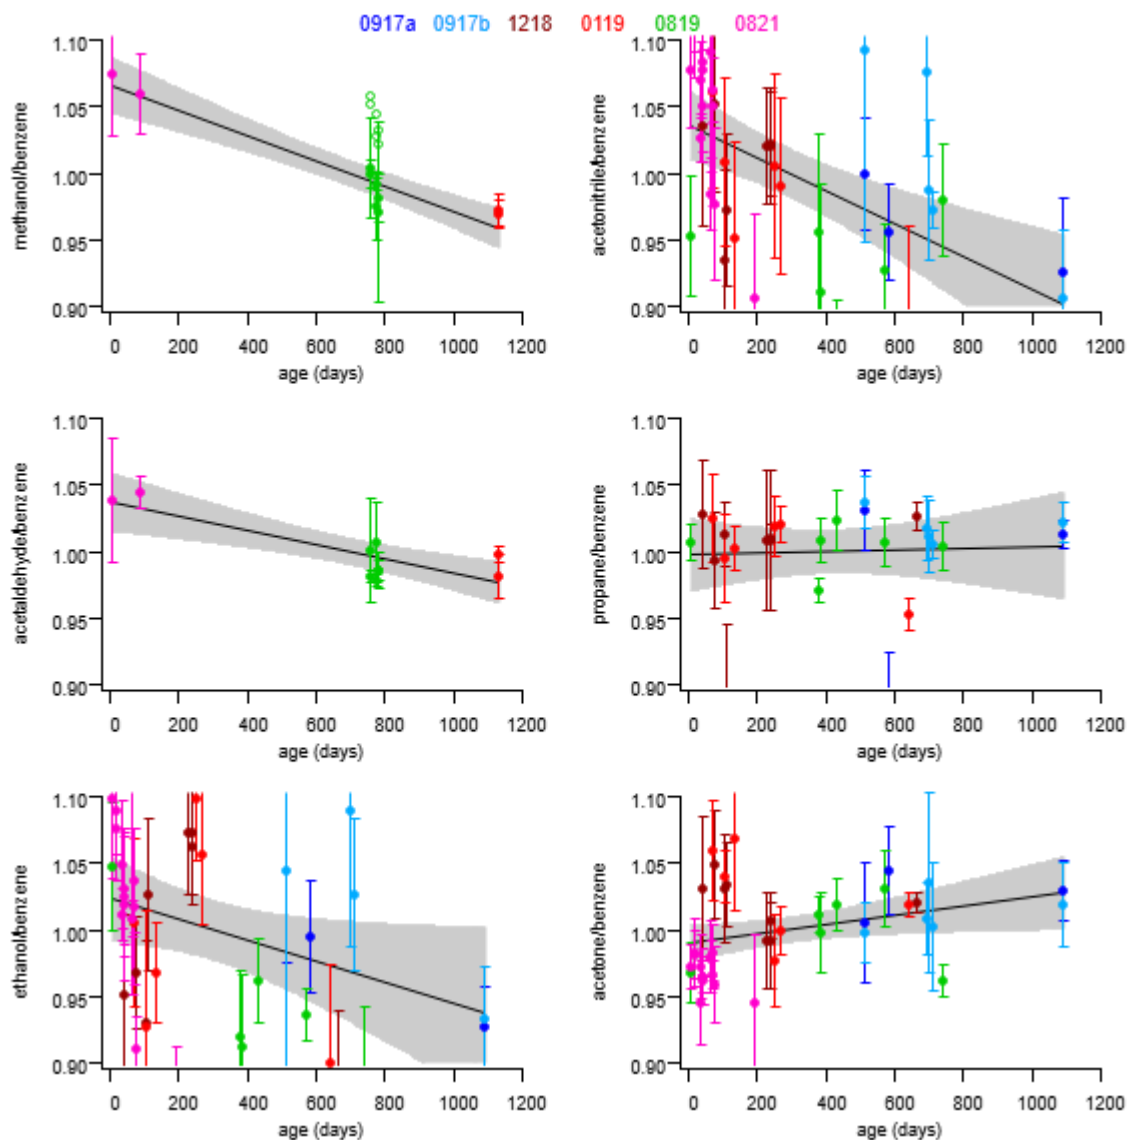

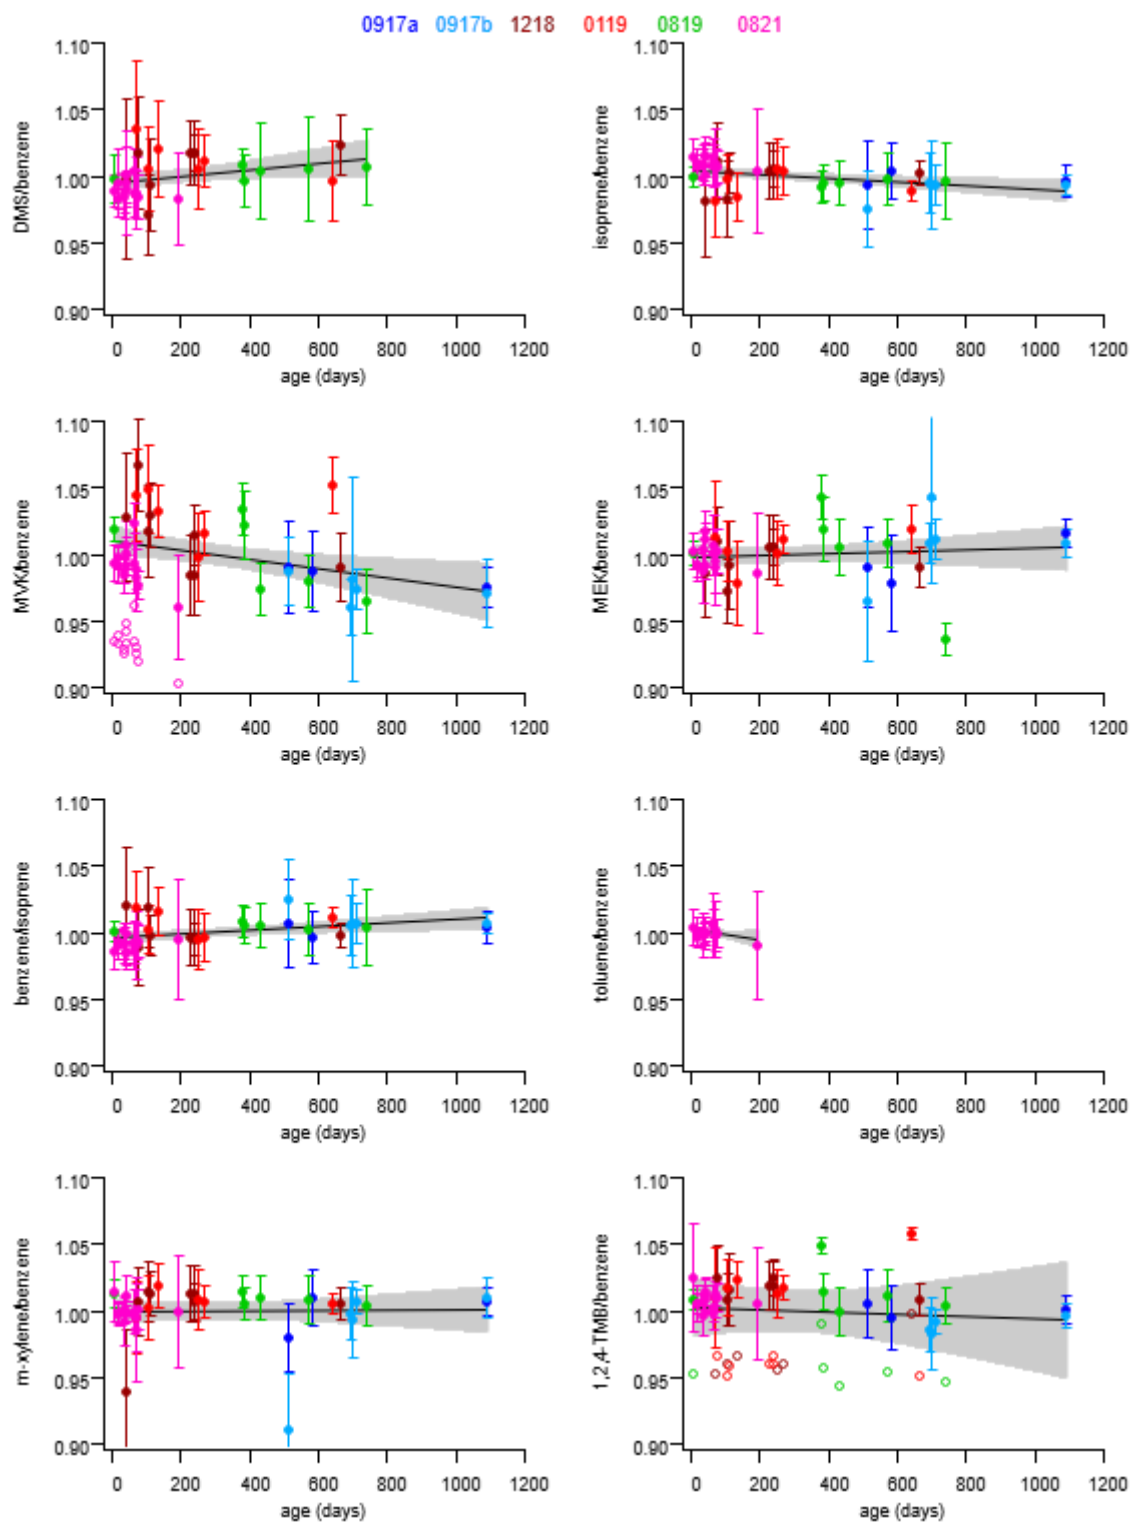



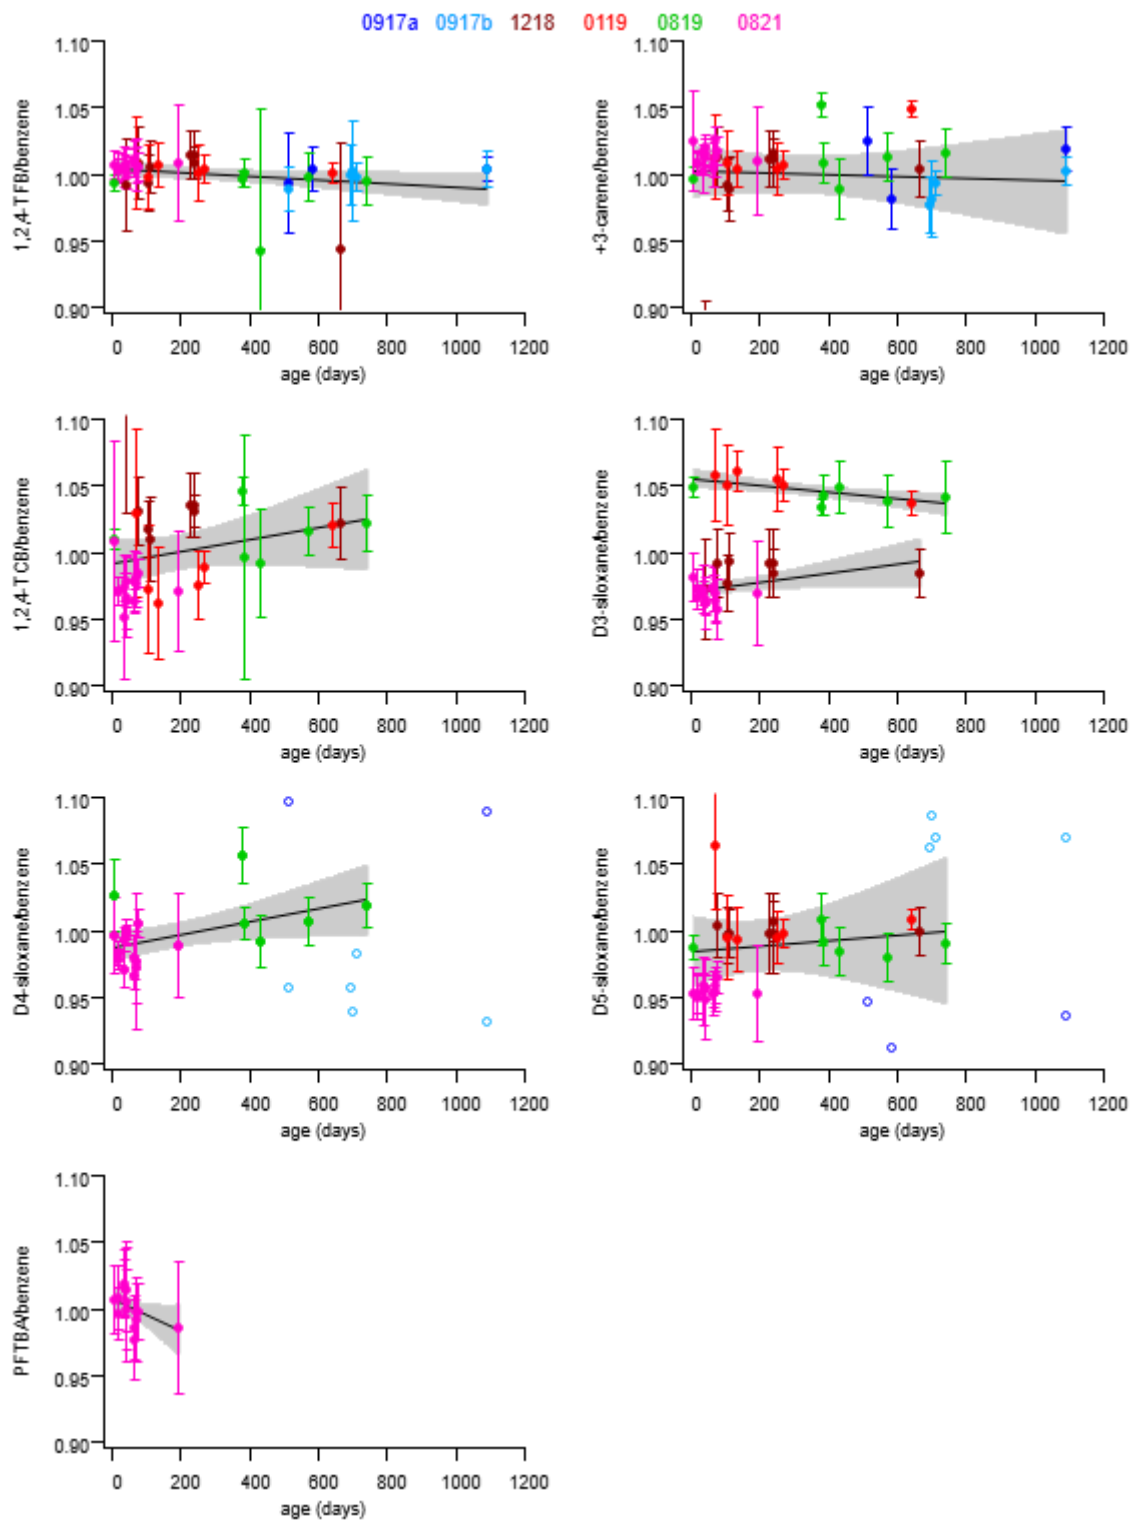



### Preparation and validation of certified reference materials

In order to meet the requirements of end users an NPL certified reference material (CRM) has been developed and is also described. Its purpose is to facilitate wider uptake and implementation to improve the comparability of PTR-MS measurements in a cost-effective and timely manner for end users. While the proton affinity of *n*-hexane is less than water and therefore does not undergo proton transfer it is still detectable depending on amount fraction because of the presence of minor impurities of  $\text{O}_2^+$  and  $\text{NO}^+$  typically 1 – 3 % (Amador-Muñoz et al., 2016), which could cause interferences from signals resulting from the charge transfer and hydride abstract ions. Therefore, an additional advantage of the CRMs is that because the solid D3-siloxane is dissolved in the other components no *n*-hexane is used any potential interferences from the presence of *n*-hexane are avoided.

To prepare the CRMs, the pure components were mixed in vials and an aliquot added to the evacuated gas cylinder, minimising the weighing and liquid addition steps, thus reducing the preparation time and effort considerably. The differences in vapour pressure between compounds, e.g., D5 siloxane (0.0003 bar), acetaldehyde (1.2 bar), could have compromised the blending tolerances of the final CRM, because the more volatile compounds fraction in the liquid mixtures may have been reduced. To minimise this, four vials were prepared, one containing the most volatile compounds (acetaldehyde, DMS, isoprene, methanol, acetone, ethanol, MVK, MEK and acetonitrile), a second containing the less volatile non-polar components (benzene, toluene, 1,2,4-TFB, *m*-xylene, 1,2,4-TMB and 3-carene), a third mixture containing the least volatile components (1,2,4-TCB, D3-siloxane, D4-siloxane and D5-siloxane). Finally, the PFTBA was added separately as it was immiscible in the other three liquid mixtures listed above. The four groups of pure chemicals were added to the vials in order from lower vapour pressure to higher vapour pressure, so the more volatile compounds remained the shortest time in the vials to minimise any evaporative losses. The amount fractions for each compound in each CRM were assigned as the analytical values determined from comparison to PRM (0821), which was used as it contained all the components of interest. The repeatability (blend tolerance) in the preparation of the CRMs was about 20 – 30 % as shown in Figure S3 though this is just indicative of the repeatability of the preparation method and does not have any effect on the assigned amount fractions as these were derived from comparison to the PRM.

**Figure S3.** Certified amount fractions of 12 CRMs illustrating the preparation repeatability (blend tolerance) at  $1 \mu\text{mol mol}^{-1}$  of approximately 20 - 30 %.

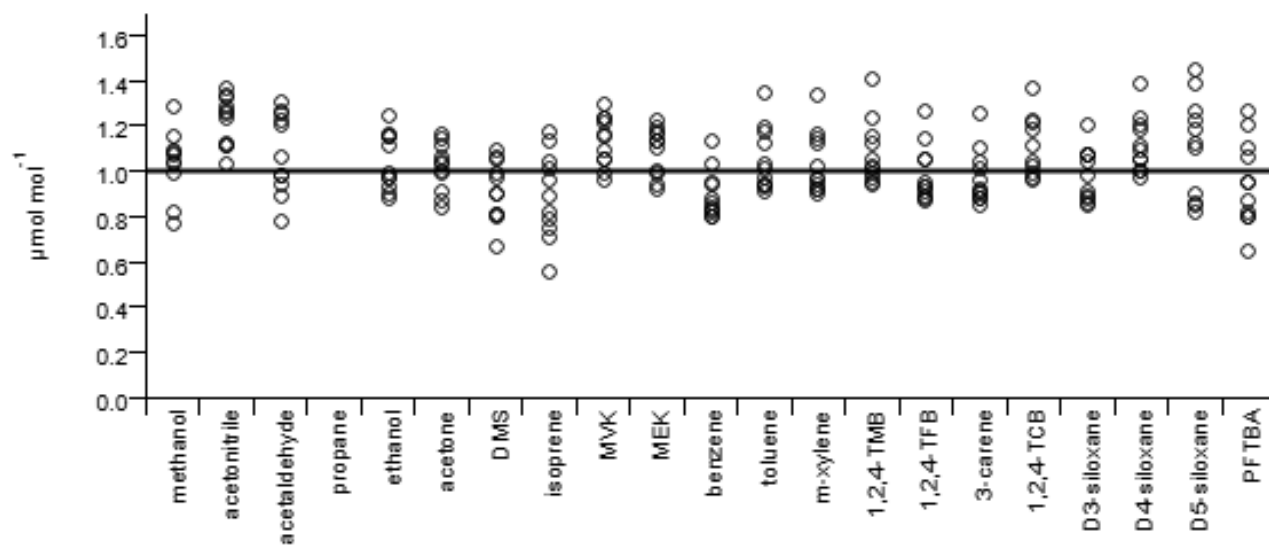

**Figure S4.** Fragmentation of cyclic siloxanes in PTR-MS

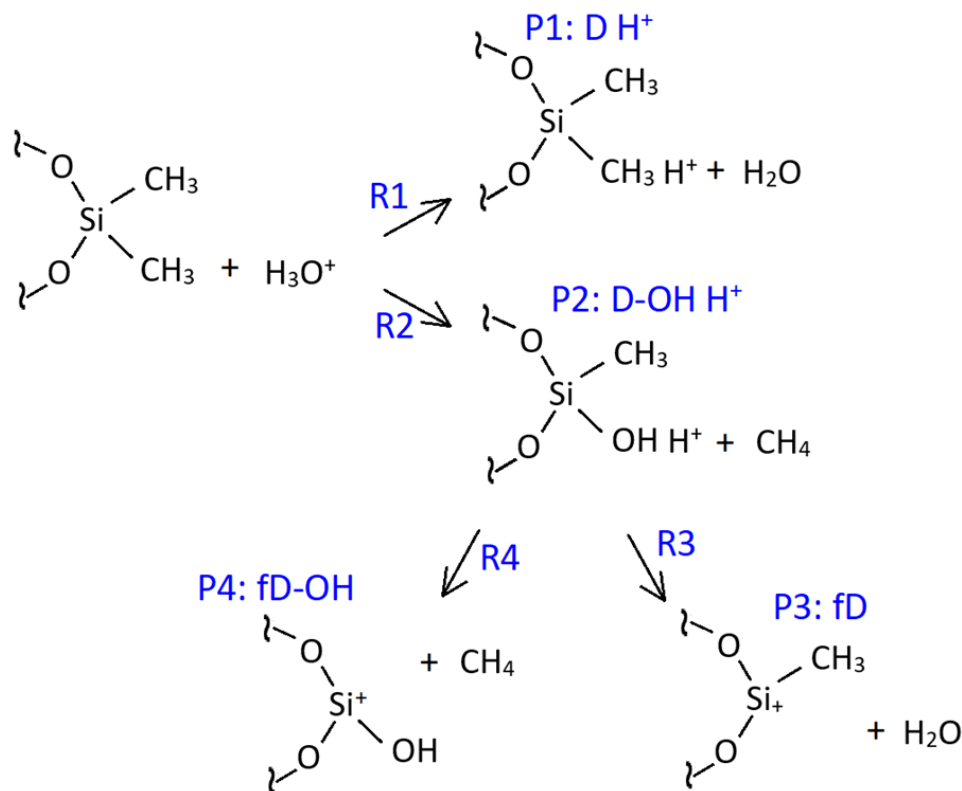

**Calculation of product ion abundances from the outlined reaction mechanism:**

| Compound    | Product ions      |                                       |                   |                                       |
|-------------|-------------------|---------------------------------------|-------------------|---------------------------------------|
|             | P1 <sup>a</sup>   | P2                                    | P3                | P4                                    |
| D3-siloxane | $m223.064 * 1.37$ | $(m225.044 - m223.064 * 0.13) * 1.36$ | $m207.033 * 1.36$ | $(m209.012 - m207.033 * 0.12) * 1.35$ |
| D4-siloxane | $m297.083 * 1.52$ | $(m299.062 - m297.083 * 0.18) * 1.51$ | $m281.052 * 1.50$ | $(m283.031 - m281.052 * 0.18) * 1.49$ |
| D5-siloxane | $m371.101 * 1.69$ | $(m373.081 - m371.101 * 0.24) * 1.68$ | $m355.071 * 1.67$ | $(m357.050 - m355.071 * 0.23) * 1.66$ |

<sup>a</sup> Correction for stable isotopes.

These assume that for D3-siloxane (209.012 / 209.030 and 225.044 / 225.061 Th are unresolved), D4-siloxane (299.062 / 299.080 and 283.031 / 283.049 Th are unresolved) and D5-siloxane (373.081 / 373.099 and 357.050 / 357.067 Th are unresolved). Note, that P4 is typically not detected for D3 and D5.

## Additional References

- Amador-Muñoz, O., Misztal, P. K., Weber, R., Worton, D. R., Zhang, H., Drozd, G., and Goldstein, A. H.: Sensitive detection of n-alkanes using a mixed ionization mode proton-transfer-reaction mass spectrometer, *Atmos. Meas. Tech.*, 9, 5315-5329, 10.5194/amt-9-5315-2016, 2016.
- Holzinger, R., Acton, W. J. F., Bloss, W. J., Breitenlechner, M., Crilley, L. R., Dusanter, S., Gonin, M., Gros, V., Keutsch, F. N., Kiendler-Scharr, A., Kramer, L. J., Krechmer, J. E., Languille, B., Locoge, N., Lopez-Hilfiker, F., Materić, D., Moreno, S., Nemitz, E., Quéléver, L. L. J., Sarda Esteve, R., Sauvage, S., Schallhart, S., Sommariva, R., Tillmann, R., Wedel, S., Worton, D. R., Xu, K., and Zaytsev, A.: Validity and limitations of simple reaction kinetics to calculate concentrations of organic compounds from ion counts in PTR-MS, *Atmos. Meas. Tech.*, 12, 6193-6208, 10.5194/amt-12-6193-2019, 2019.
- Kierkegaard, A. and McLachlan, M. S.: Determination of linear and cyclic volatile methylsiloxanes in air at a regional background site in Sweden, *Atmospheric Environment*, 80, 322-329, <https://doi.org/10.1016/j.atmosenv.2013.08.001>, 2013.
- Zhao, J. and Zhang, R.: Proton transfer reaction rate constants between hydronium ion ( $\text{H}_3\text{O}^+$ ) and volatile organic compounds, *Atmospheric Environment*, 38, 2177-2185, <http://dx.doi.org/10.1016/j.atmosenv.2004.01.019>, 2004.
